# Supplementary material for: Abnormally Expressed lncRNAs as Potential Biomarkers for Gastric Cancer Risk: A Diagnostic Meta‐Bioinformatics Analysis
Source: Hindawi journal article supplement (doi:10.1155/2022/6712625), 2022-01-01
Supplement: f2 [file 6712625.f2.pdf]

# Meta-analysis estimates, given named study is omitted

Lower CI Limit

○ Estimate

Upper CI Limit

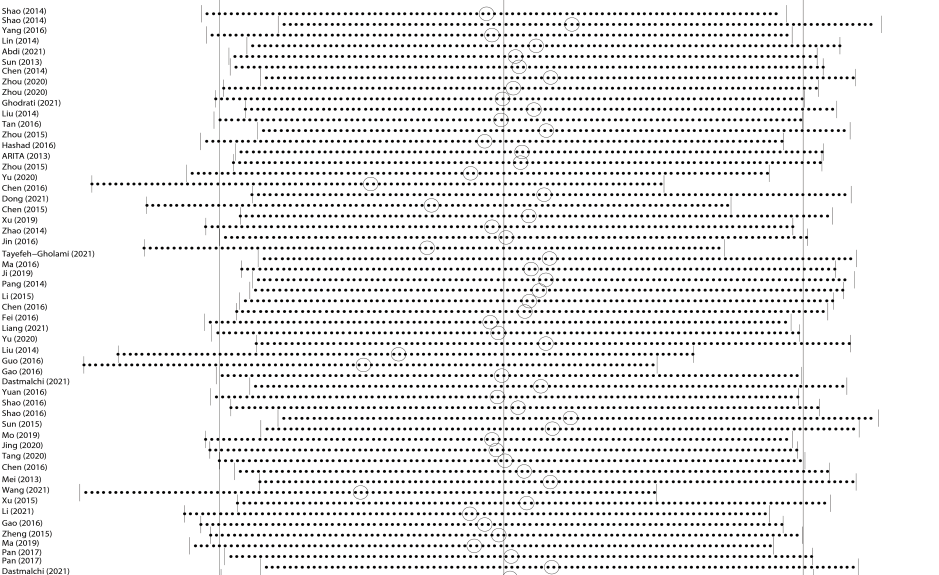

2.39      2.45      2.57      2.70      2.74
